# Supplementary material
Source: HighWire-hosted journal article supplement (https://bmjopen.bmj.com/content/12/8/e061113)
Supplement: inline-supplementary-material-1 [file inline-supplementary-material-1.pdf]

## **SUPPLEMENTARY MATERIAL**

### **36-Item Short Form Survey (SF-36)**

The SF-36 is a non-disease specific health related quality of life measure developed as part of the Medical Outcome Study (MOS). The SF-36 is self-administered and measures 8 domains of health status; physical functioning, physical role limitations, emotional role limitations, pain, general health perceptions, energy/vitality, social functioning and mental health.

### **EuroQol 5-Dimension 5-Level health questionnaire (EQ-5D-5L)**

The EQ-5D-5L is a non-disease specific health related quality of life measure developed by the EuroQol group. The EQ-5D-5L is self-administered and measures health 5 dimensions (mobility, self-care, usual activities, pain or discomfort, and anxiety or depression) and uses a visual analogue score to measure health today on a scale from 0 to 100

### **Medical Outcome Study Sleep Scale (MOS Sleep)**

The MOS Sleep is a sleep measure developed as part of the Medical Outcome Study (MOS). The questionnaire is self-administered and assesses 12 items; sleep disturbance, sleep adequacy, somnolence, quantity of sleep, snoring, and awakening short of breath or with a headache.

### **Hospital Anxiety and Depression Score (HADS)**

The HADS is a self-administered questionnaire comprising of seven questions for anxiety and seven questions for depression. Anxiety and depression scores are calculated independently and are categorised in the following thresholds: 8–10 mild, 11–14 moderate, 15–21 severe. For both scales, scores of less than 7 indicate non-cases.

**Footplate Stimulation Programme and Parameters**

| Mode      | Phase Duration (µs) | Basic Wave Frequency (kHz) | Frequency (Hz) | On Duration (s) | Off Duration (s) | Voltage (V) (Level=99) | Current (mA) (Level=99) | Voltage (V) (Level=50) | Current (mA) (Level=50) |
|-----------|---------------------|----------------------------|----------------|-----------------|------------------|------------------------|-------------------------|------------------------|-------------------------|
| Tolerance | ±10%                | ±10%                       | ±10%           | ±10%            | ±10%             | ±15%                   | ±15%                    | ±15%                   | ±15%                    |
| 1         | 450                 | 1.4                        | 20.0           | 3.2             | 1.0              | 70                     | 10.1                    | 43                     | 6.4                     |
| 2         | 450                 | 1.4                        | 25.0           | 6.9             | 1.0              | 69                     | 11.3                    | 42                     | 7.4                     |
| 3         | 450                 | 1.4                        | 38.8           | 4.4             | 1.0              | 66                     | 12.9                    | 41                     | 8.2                     |
| 4         | 450                 | 1.4                        | 35.7           | 7.1             | 1.0              | 67                     | 12.8                    | 41                     | 8.1                     |
| 5         | 450                 | 1.4                        | 32.5           | 4.4             | 1.5              | 67                     | 12.7                    | 40                     | 7.9                     |
| 6         | 450                 | 1.4                        | 32.4           | 4.6             | 1.0              | 67                     | 12.6                    | 40                     | 7.9                     |
| 7         | 970                 | 1.0                        | 35.6           | 1.9             | 1.5              | 52                     | 14.0                    | 34                     | 9.7                     |
| 8         | 450                 | 1.4                        | 25.3           | 4.3             | 1.5              | 70                     | 11.4                    | 43                     | 7.4                     |
| 9         | 450                 | 1.4                        | 32.5           | 7.8             | 1.0              | 68                     | 12.5                    | 40                     | 7.7                     |
| 10        | 450                 | 1.4                        | 43.7           | 8.3             | 1.0              | 63                     | 13.6                    | 37                     | 8.3                     |
| 11        | 450                 | 1.4                        | 31.3           | 2.2             | 1.5              | 68                     | 12.4                    | 40                     | 7.7                     |
| 12        | 450                 | 1.4                        | 43.6           | 5.5             | 1.0              | 63                     | 13.4                    | 37                     | 7.9                     |
| 13        | 450                 | 1.4                        | 43.7           | 4.6             | 1.0              | 67                     | 12.6                    | 40                     | 7.9                     |
| 14        | 450                 | 1.4                        | 37.6           | 4.2             | 1.0              | 66                     | 13.2                    | 41                     | 8.3                     |
| 15        | 450                 | 1.4                        | 43.7           | 5.0             | 1.0              | 62                     | 13.5                    | 37                     | 8.3                     |

Quadriceps Stimulation Programme and Parameters

| Mode      | Phase Duration (µs) | Basic Wave Frequency (kHz) | Frequency (Hz) | On Duration (s) | Off Duration (s) | Voltage (V) (Level=99) | Current (mA) (Level=99) | Voltage (V) (Level=50) | Current (mA) (Level=50) |
|-----------|---------------------|----------------------------|----------------|-----------------|------------------|------------------------|-------------------------|------------------------|-------------------------|
| Tolerance | ±10%                | ±10%                       | ±10%           | ±10%            | ±10%             | ±15%                   | ±15%                    | ±15%                   | ±15%                    |
| 1         | 450                 | 1.4                        | 32.5           | 33              | 27               | 65.2                   | 12.2                    | 41.2                   | 8.14                    |
| 2         | 450                 | 1.4                        | 32.5           | 13              | 17               | 65.2                   | 12.2                    | 41.2                   | 8.14                    |
